# Supplementary material for: Assessment of the diagnostic and prognostic relevance of ACAT1 and CE levels in plasma, peritoneal fluid and tumor tissue of epithelial ovarian cancer patients - a pilot study
Source: PubMed Central journal article supplement (PMC8994887; doi:10.1186/s12885-022-09476-6), 2022-04-10
Supplement: 12885_2022_9476_MOESM1_ESM.pdf [file 12885_2022_9476_MOESM1_ESM.pdf]

## Supplementary Table 1: Ovarian Cancer - Prognoscan Online Platform Analysis

| Cohort            | Contributor | Array type     | Probe ID  | N   | COX p-value         | HR [95% CI]        |
|-------------------|-------------|----------------|-----------|-----|---------------------|--------------------|
| Duke              | Bild        | HG-U133A       | 221561_at | 133 | 0.0145 <sup>a</sup> | 0.51 [0.29 - 0.87] |
| Milan (1992-2003) | Marchini    | G4100A         | 12236     | 81  | 0.0119 <sup>a</sup> | 2.25 [1.20 - 4.22] |
| MSKCC (1990-2003) | Bonome      | HG-U133_Plus_2 | 221561_at | 185 | 0.0019 <sup>b</sup> | 2.28 [1.36 - 3.82] |
| MSKCC (1990-2003) | Bonome      | HG-U133_Plus_2 | 221561_at | 185 | 0.0216 <sup>a</sup> | 1.96 [1.10 - 3.47] |

a: overall survival; b: disease free survival

**Supplementary Figure 1: Kaplan-Meier Plotter Analysis.** *Overall survival* curves for SOAT1 (221561\_at) were obtained for Ovarian Cancer patients divided into two groups as low-expression and high expression based on the optimal cut-off value for survival. Information was obtained from the public database available at <https://kmplot.com/analysis/>

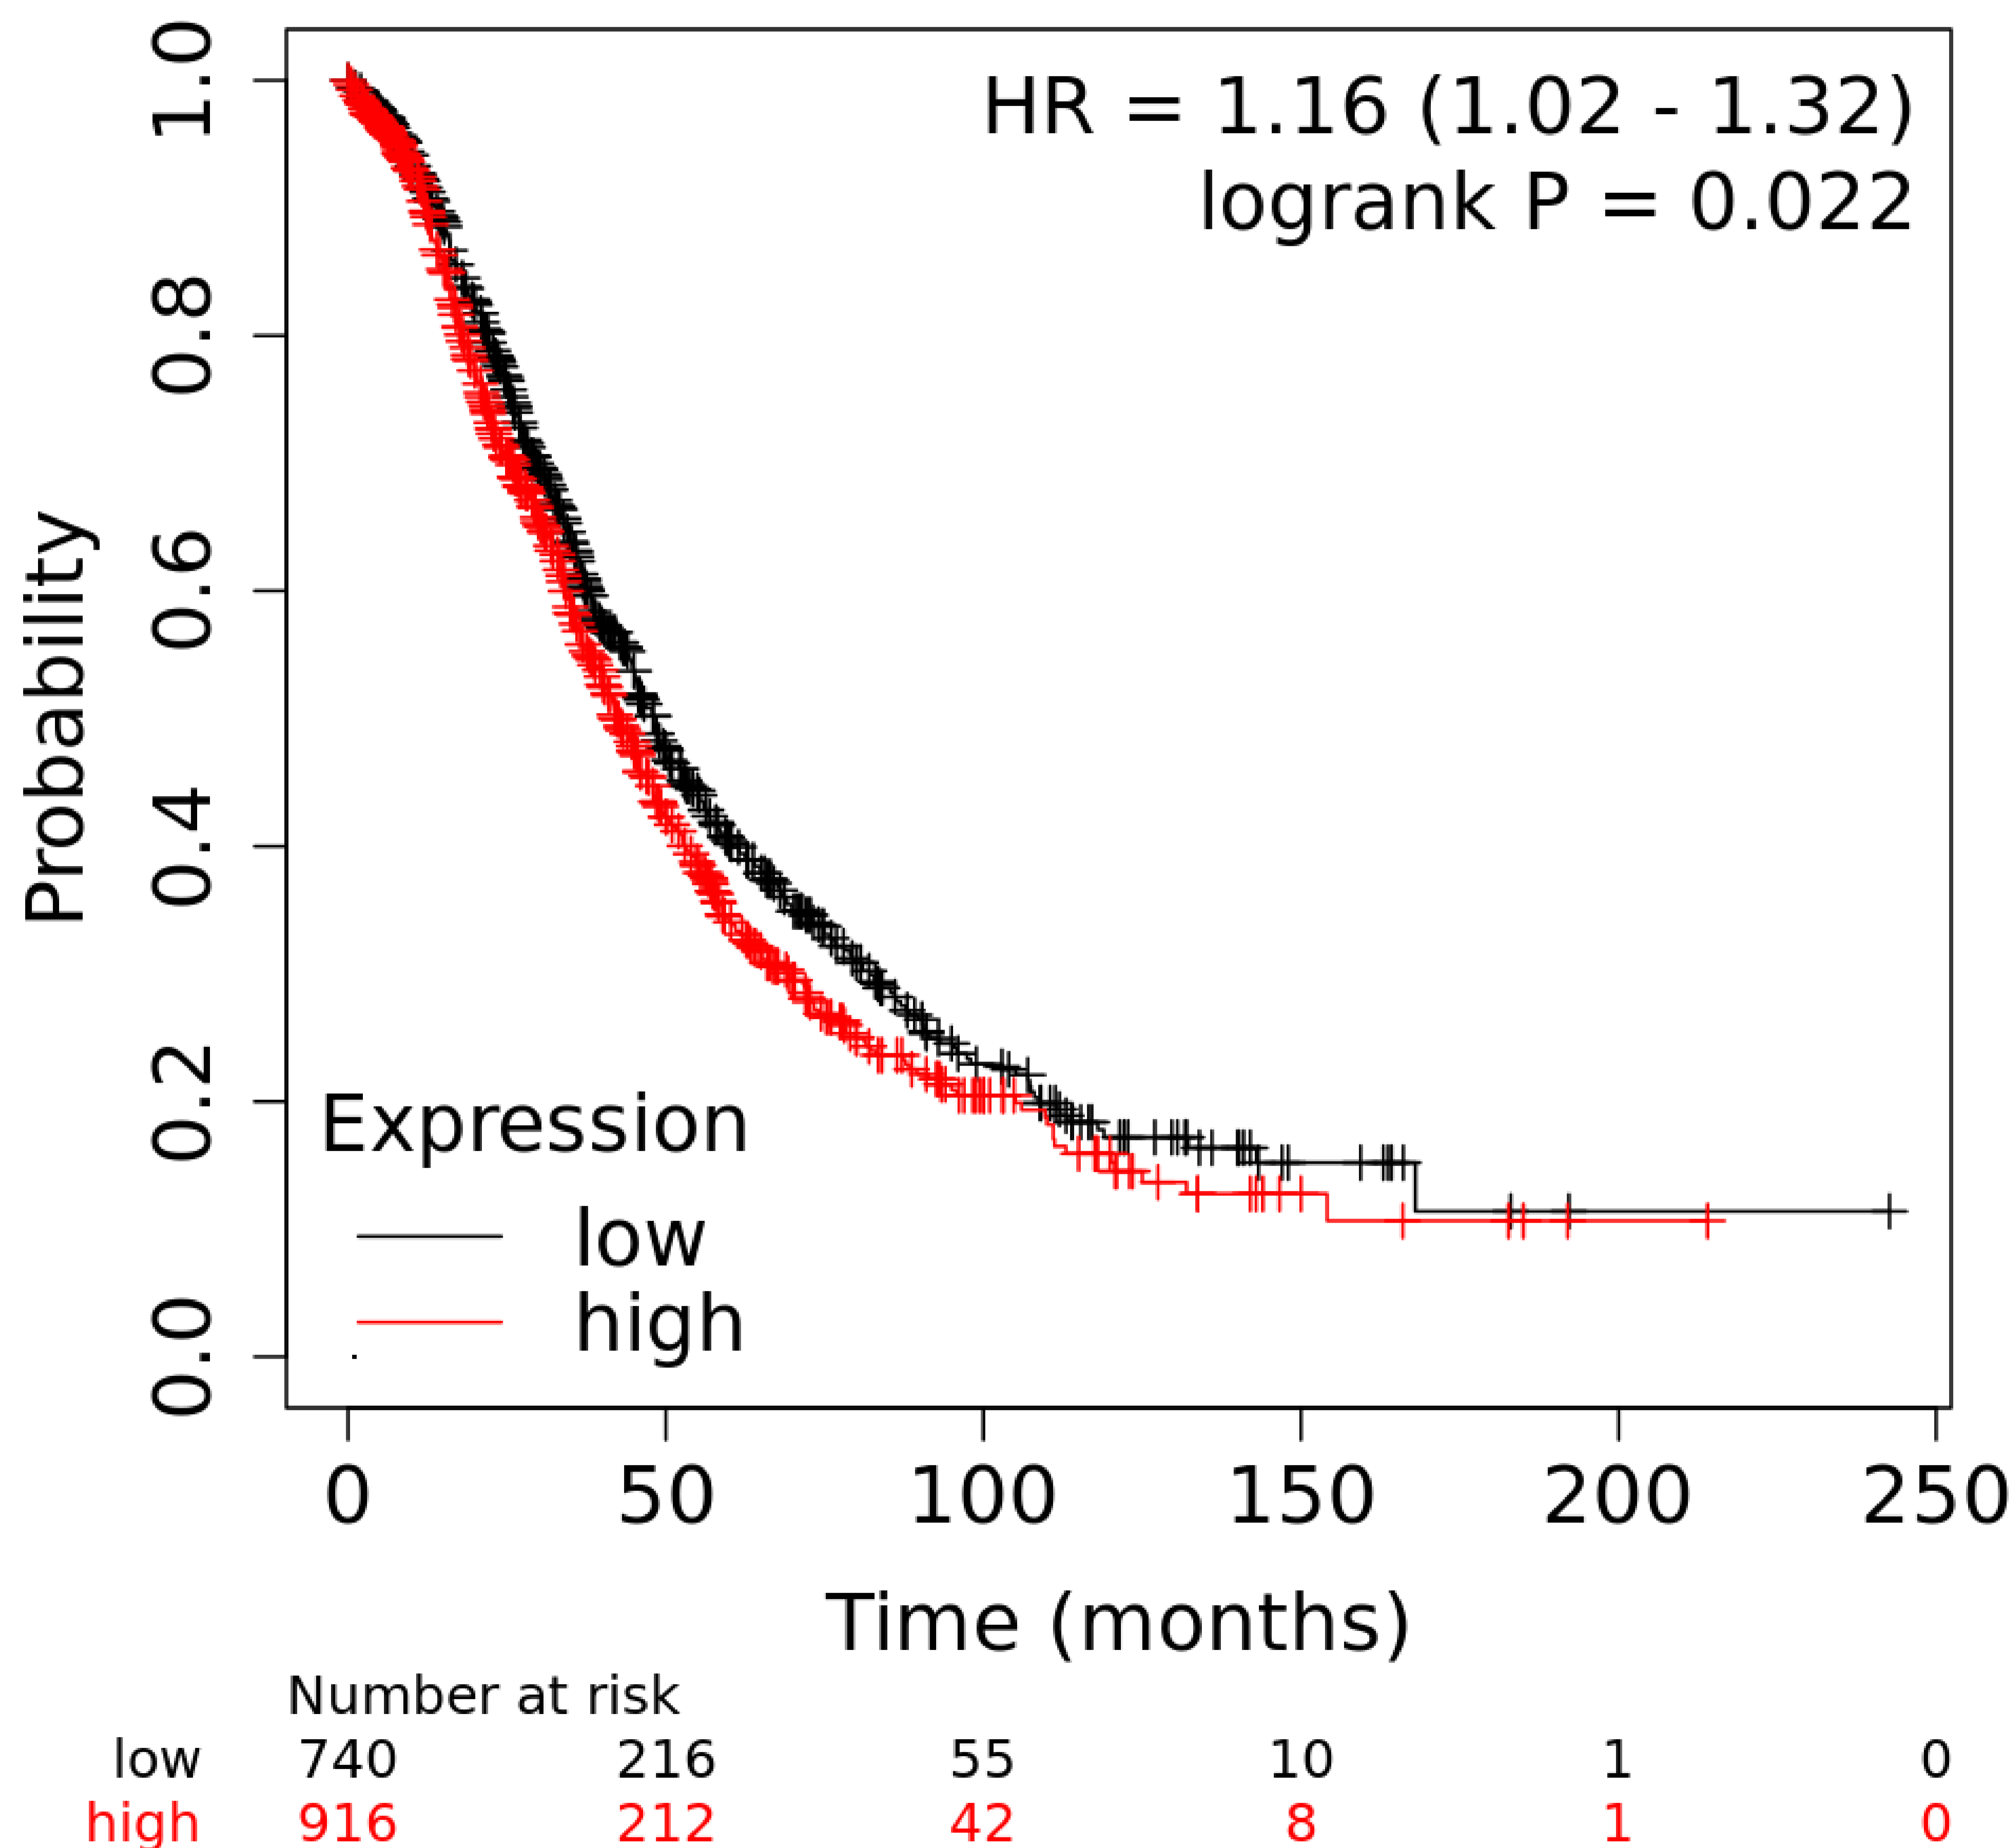

## Supplementary Figure 2: The Cancer Genome Atlas (TCGA)

Analysis. **5-year survival** curves for Ovarian Cancer patients divided into two groups (low vs. high ACAT1 expression) based on the optimal cut-off value for survival. Information was obtained from the public database available at <https://www.proteinatlas.org>

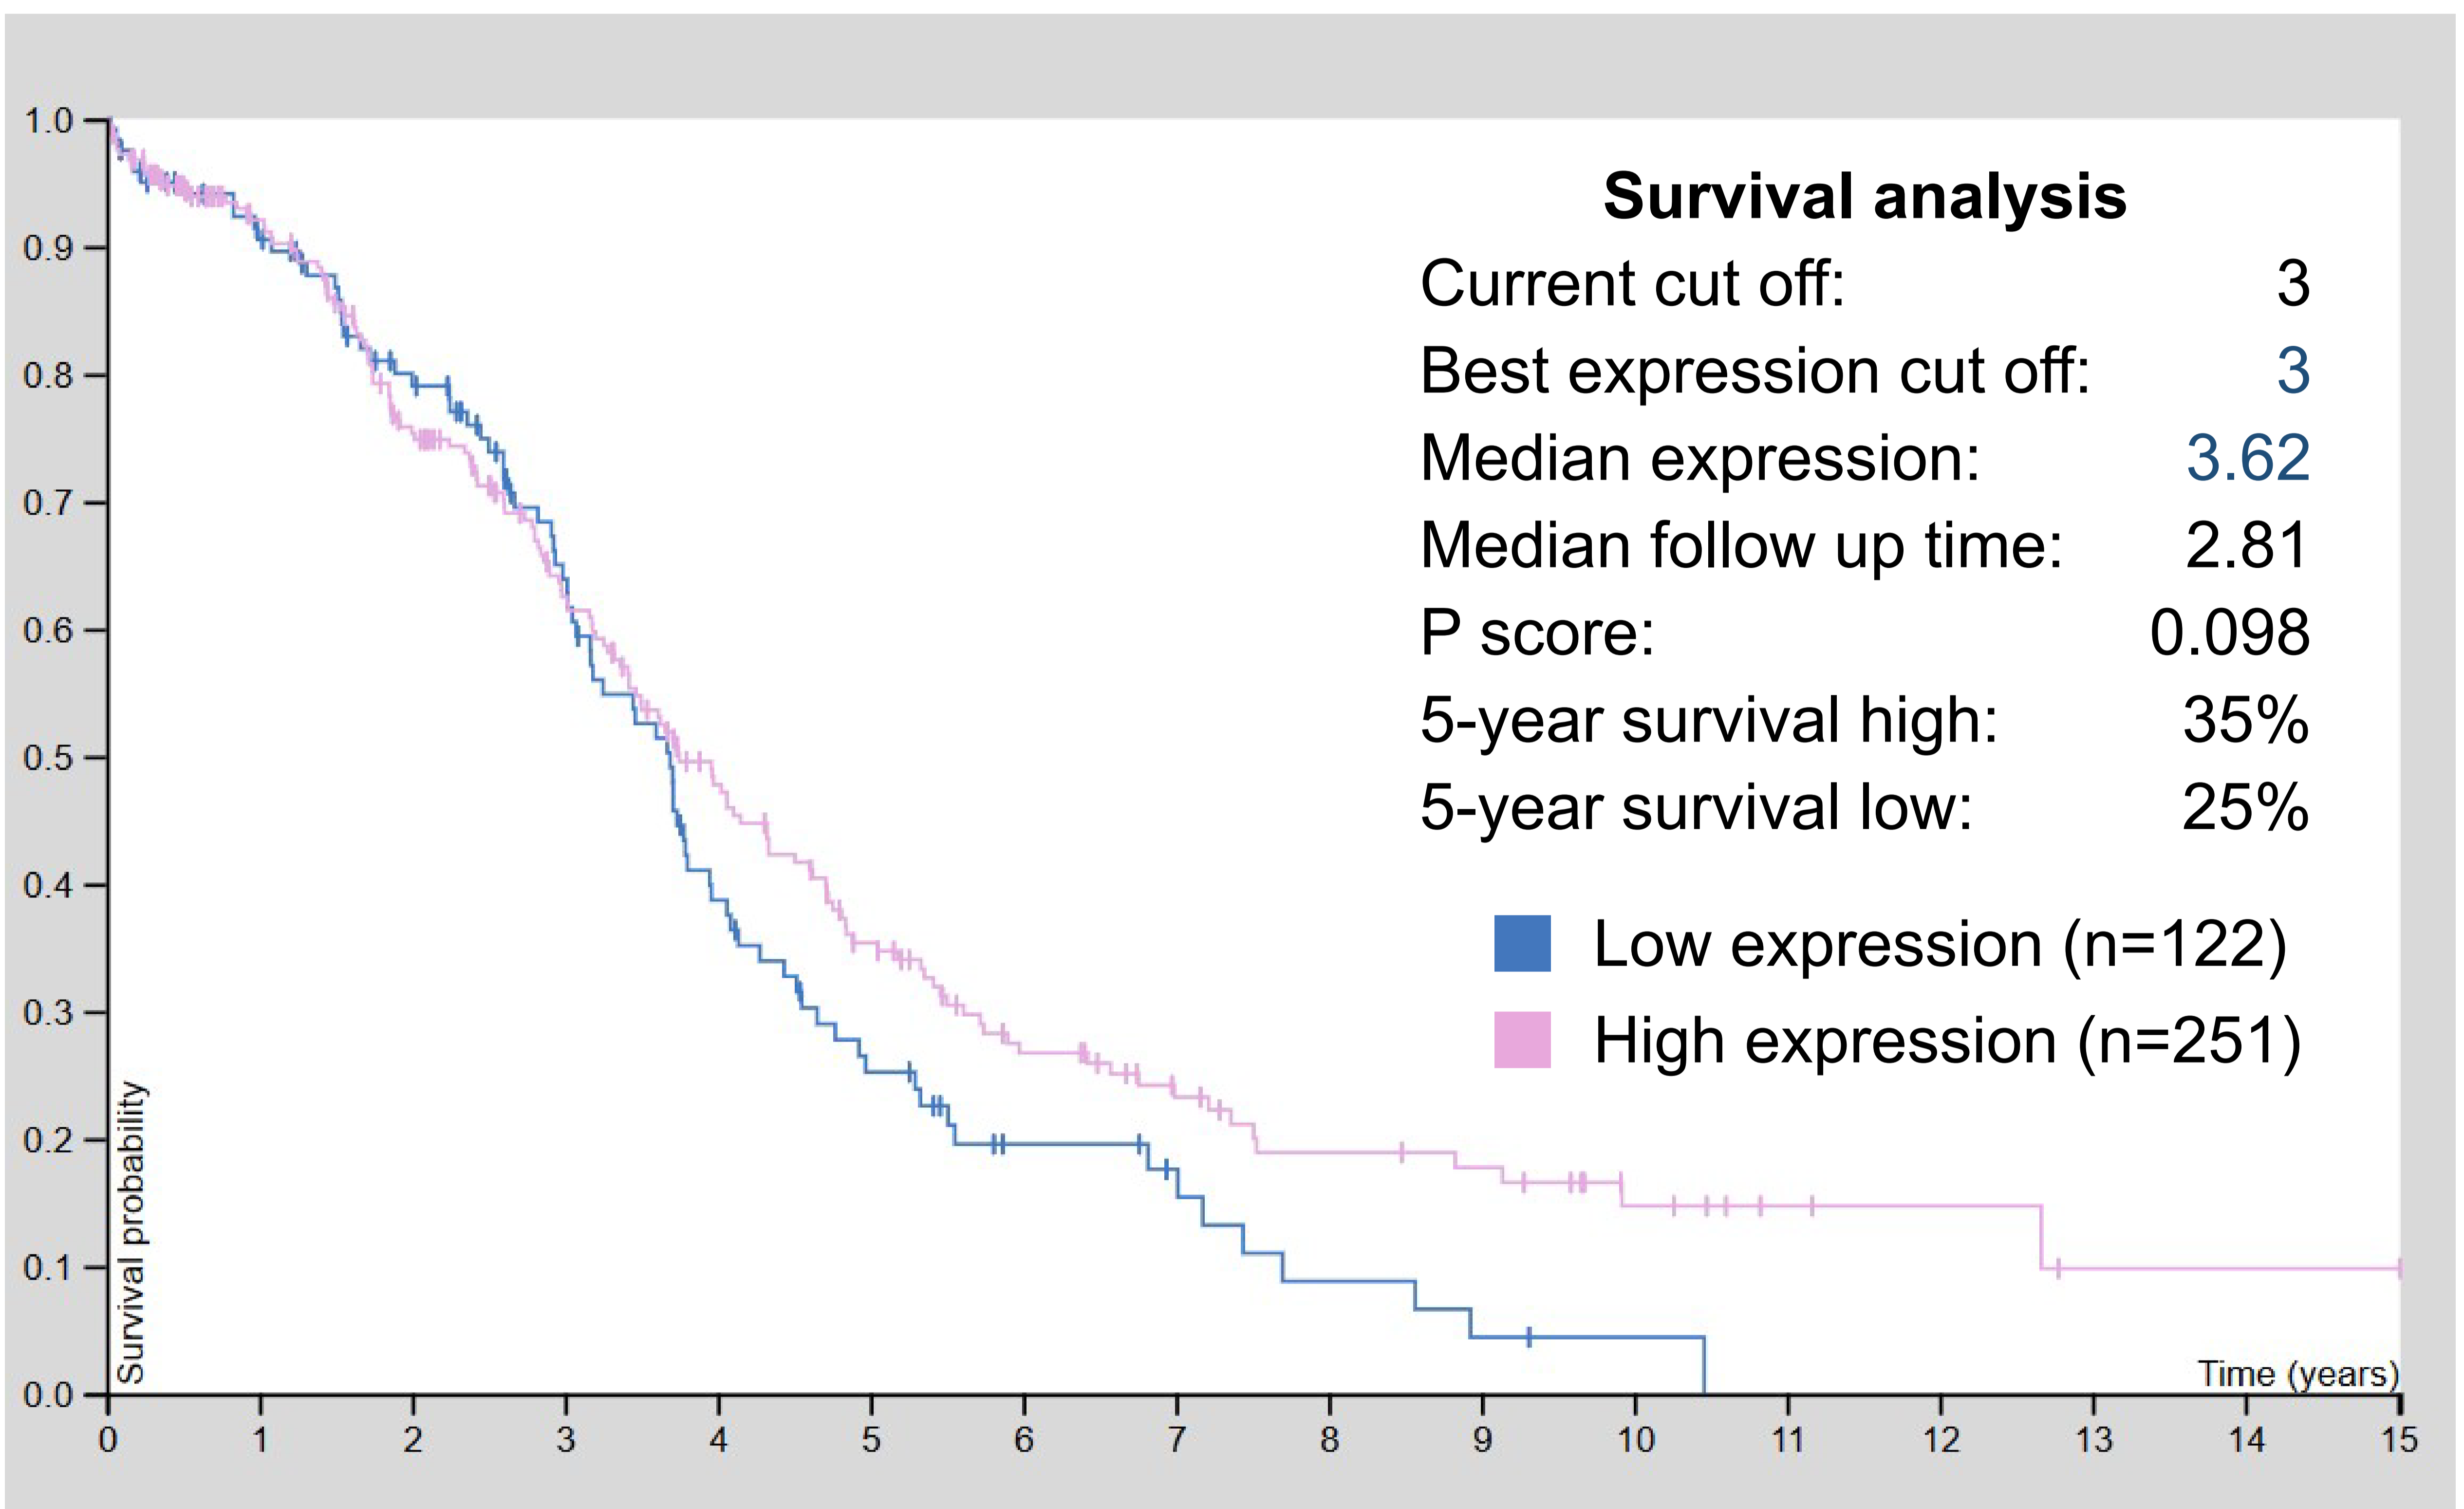

**Supplementary Figure 3: cBioPortal database analysis. *Overall survival*** curves for Ovarian Cancer patients divided into different ACAT1 gene expression groups based on quartiles. Information was obtained from the public database available at

<https://www.cbioportal.org>

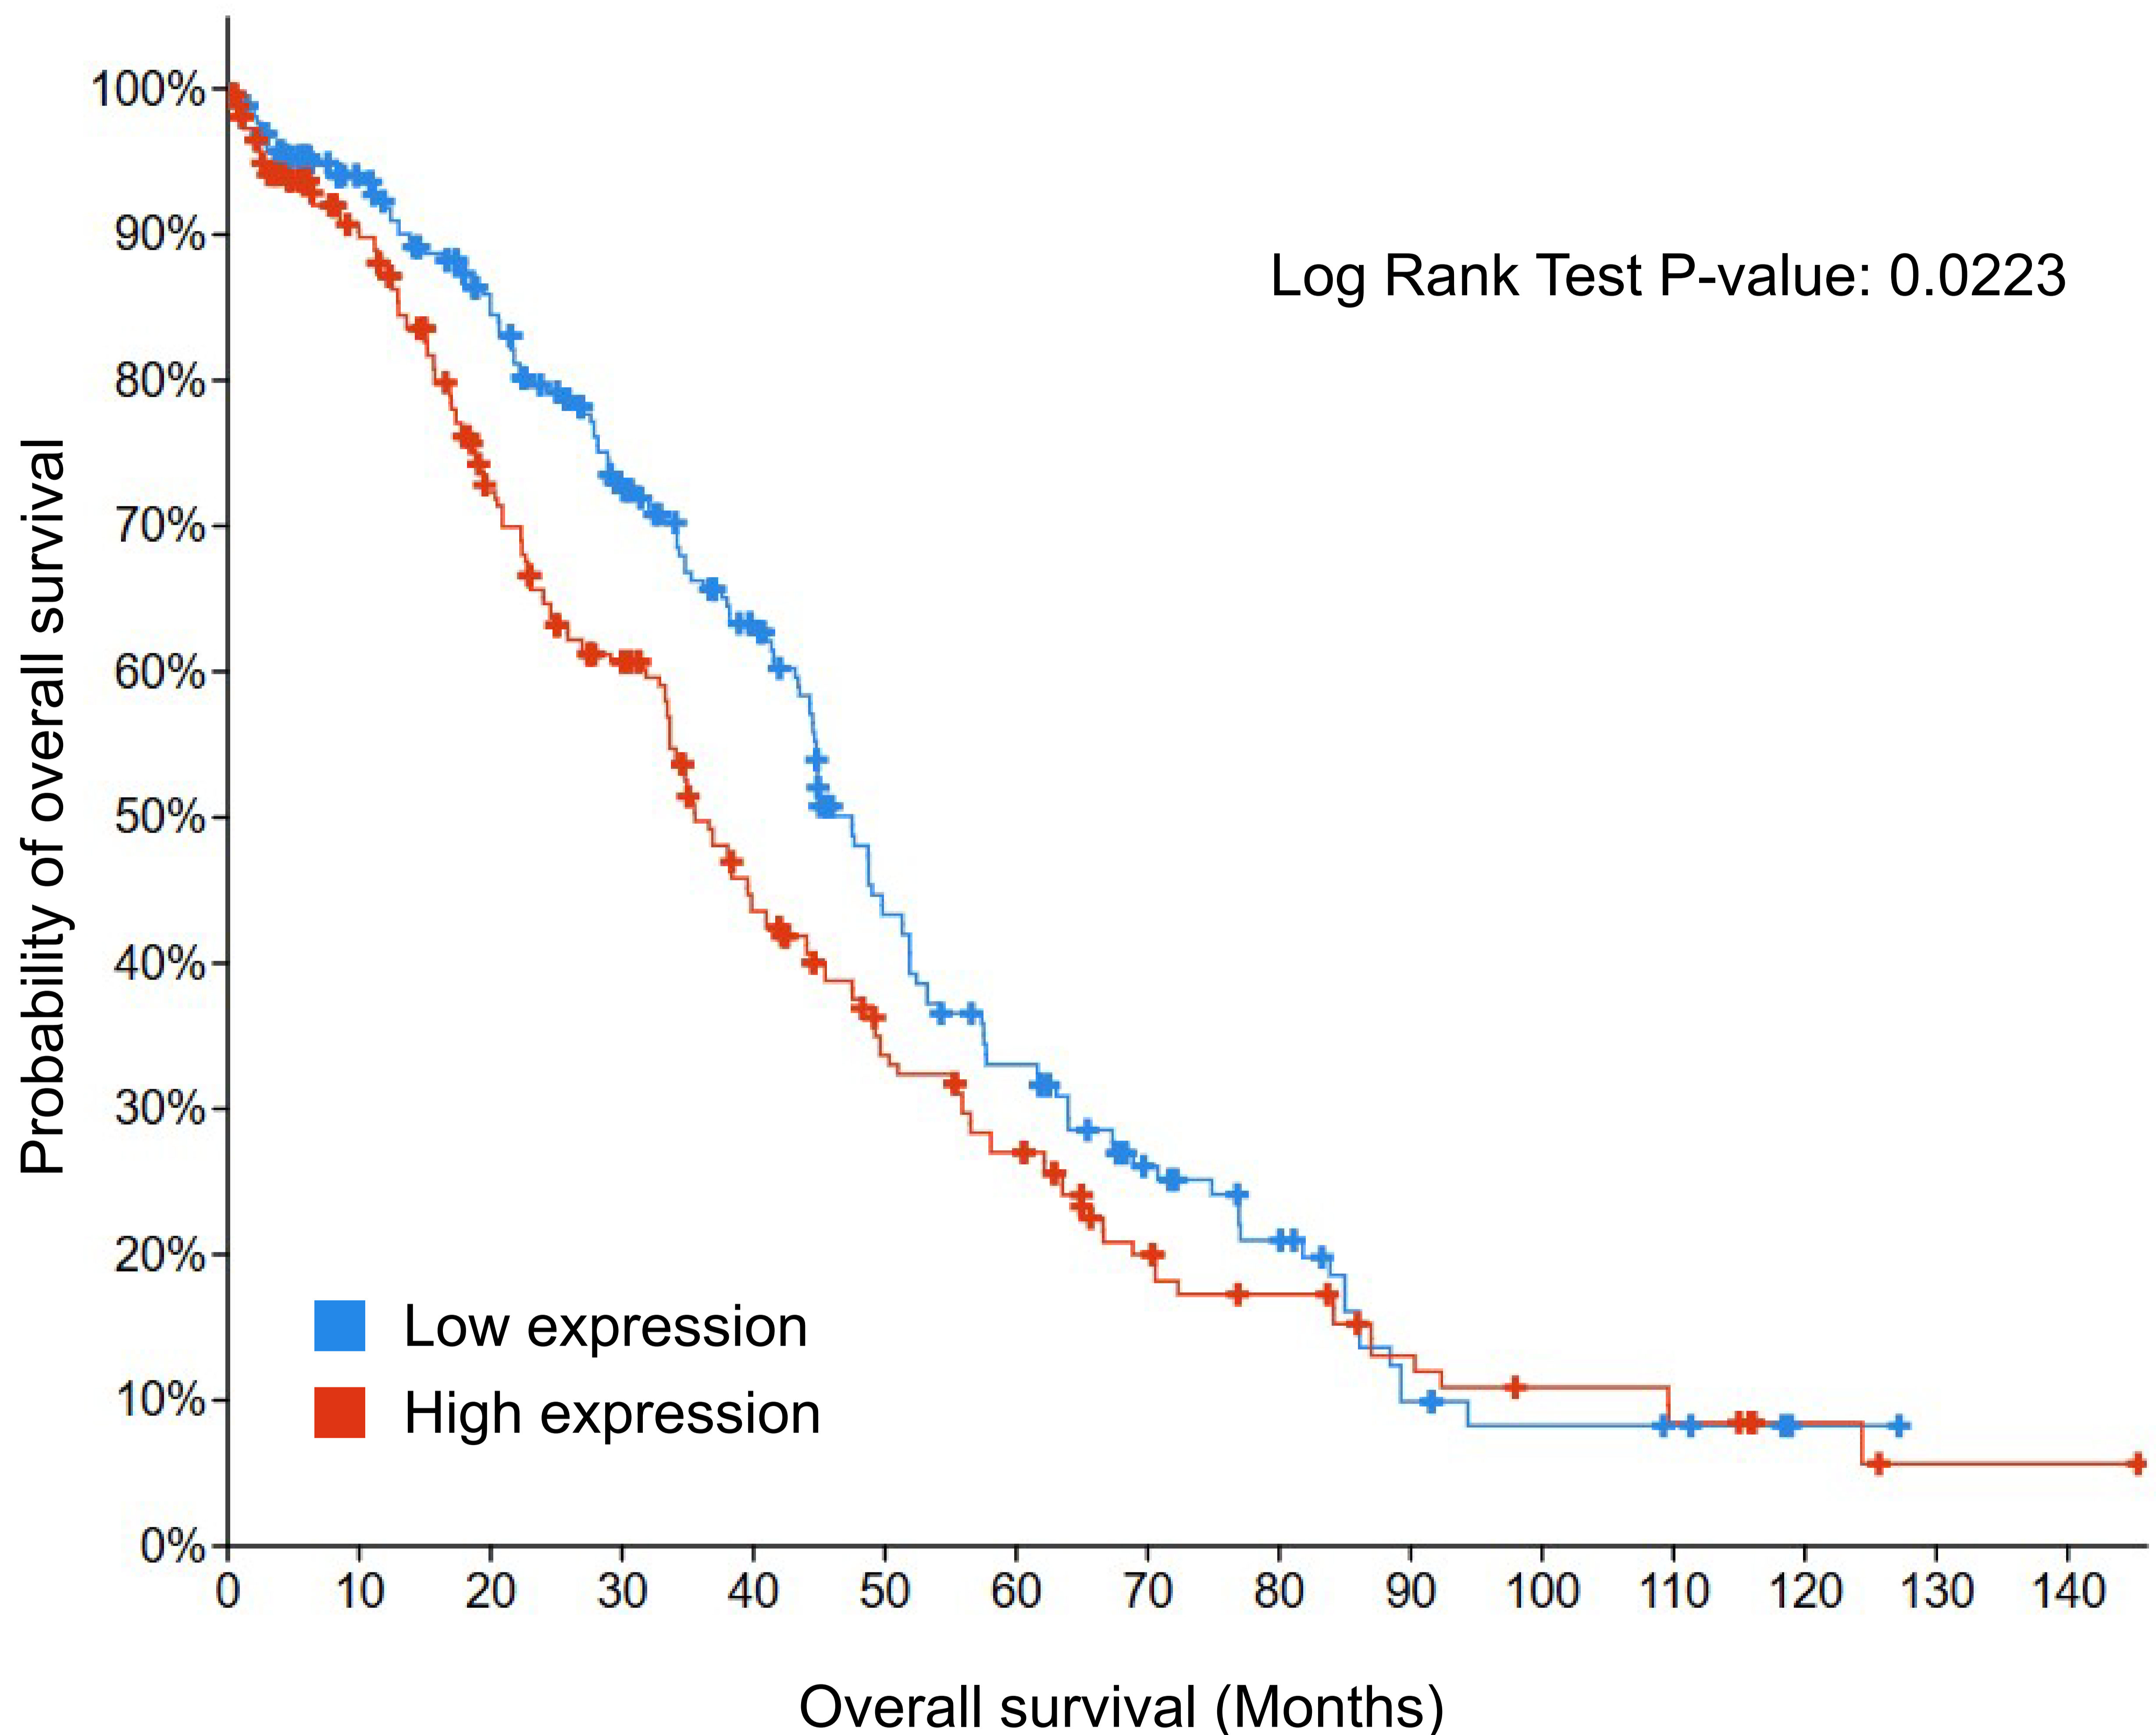

|                             | Number of Cases | Number of Events | Median Months Overall (95% CI) |
|-----------------------------|-----------------|------------------|--------------------------------|
| Low expression (-0.87-0.02) | <b>260</b>      | <b>146</b>       | <b>47.50 (44.51 - 51.87)</b>   |
| High expression (0.02-0.63) | <b>260</b>      | <b>165</b>       | <b>35.55 (33.64 - 41.98)</b>   |
